# Supplementary material for: Zein and gum arabic nanoparticles: potential enhancers of immunomodulatory functional activity of selenium-containing peptides
Source: Royal Society of Chemistry journal article supplement (doi:10.1039/d4fo02572e), 2024-01-01
Supplement: d4fo02572e1.pdf [file d4fo02572e1.pdf]

### Supplementary material

**Table S1** Primer sequences for real-time fluorescent quantitative PCR

| Gene           | Direction | Primer sequences (5' - 3') |
|----------------|-----------|----------------------------|
| TNF- $\alpha$  | Forward   | GGACTAGCCAGGAGGGAGAACAG    |
|                | Reverse   | GCCAGTGAGTGAAAGGGACAGAAC   |
| IFN- $\gamma$  | Forward   | CTGGAGGAACTGGCAAAGGATGG    |
|                | Reverse   | GACGCTTATGTTGTTGCTGATGGC   |
| IL-6           | Forward   | CTTCTGGGACTGATGCTGGTGAC    |
|                | Reverse   | TCTGTTGGGAGTGGTATCCTCTGTG  |
| $\beta$ -actin | Forward   | ATCACTATTGGCAACGAGCG       |
|                | Reverse   | TCAGCAATGCCTGGGTACAT       |
